# Supplementary material for: Lactiplantibacillus plantarum CCFM8661 alleviates d-galactose-induced brain aging in mice by the regulation of the gut microbiota
Source: Royal Society of Chemistry journal article supplement (doi:10.1039/d3fo03377e), 2023-01-01
Supplement: d3fo03377e3.pdf [file d3fo03377e3.pdf]

## Supplementary materials

### 1. Methods and materials

#### 1.1 Animal experimental design

**Table S1. Animal experimental design**

| Groups(n=8)                                     | Treatments (8 weeks)                                                                                                                                   |
|-------------------------------------------------|--------------------------------------------------------------------------------------------------------------------------------------------------------|
| Control group                                   | Sterile saline administered by gavage + sterile saline administered by subcutaneous injection                                                          |
| Model group                                     | Sterile saline was administered by gavage + D-galactose was administered by subcutaneous injection (500 mg/kg body weight)                             |
| <i>L. plantarum</i> CCFM8661 intervention group | $10^9$ CFU/mL <i>L. plantarum</i> CCFM8661 was administered by gavage + D-galactose was administered by subcutaneous injection (500 mg/kg body weight) |

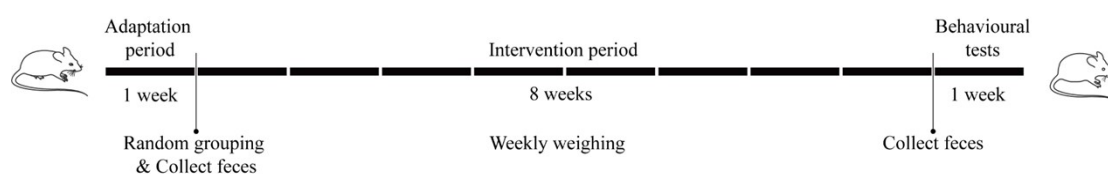

**Figure S1.** Diagram of the timing of the animal intervention

## 1.2 Quantitative real-time PCR (qRT-PCR)

Total RNA was extracted from the hippocampus and colon (Trizol method). and its concentration and purity were determined. RT-qPCR was performed on a BioRad-CFX384 machine (Bio-Rad, California, USA) using SYBR Green Supermix. The PCR reaction was performed in a total volume of 10  $\mu$ l. The thermal cycling consisted of 95°C for 30 sec, and 40 cycles of 95 °C for 5 sec, 60 °C for 30 sec. After the PCR a melting curve (65°C~95°C, increment 0.5°C) was generated to check the specificity of the amplified fragment.

**Table S2. Primers used in qPCR**

| Gene          |   | 5'-3'                    |
|---------------|---|--------------------------|
| GAPDH         | F | GCAAAGTGGAGATTGTTGCCAT   |
|               | R | CCTTGACTGTGCCGTTGAATTT   |
| Akt1          | F | CATCGTGTGGCAG-GATGTGTA   |
|               | R | ACCTGGTGTCTAGTCTCAGAGGTG |
| p65           | F | GACACGACAGAATCCTCAGCATCC |
|               | R | CCACCAGCAGCAGCAGACATG    |
| Klotho        | F | ATCTTTGACCAGACCTTGAATGAA |
|               | R | GAACATCATGGCATCCAAGCAC   |
| HO-1          | F | AACAAGCAGAACCCAGTCTATGC  |
|               | R | AGGTAGCGGGTATATGCGTGGGCC |
| Gsr           | F | TGGCACTTGCGTGAATGTTG     |
|               | R | TGTTCAAGCGGCTCACATAG     |
| ZO-1          | F | CTTCTCTTGCTGGCCCTAAAC    |
|               | R | TGGCTTCACTTGAGGTTTCTG    |
| ZO-2          | F | AACGGATGCTGGAAGTTAAT     |
|               | R | TCTGCTTGCTGTCTCTCAACA    |
| Occludin      | F | CACACTTGCTTGGGACAGAG     |
|               | R | TAGCCATAGCCTCCATAGCC     |
| Claudin-1     | F | GATGTGGATGGCTGTCATTG     |
|               | R | CCTGGCCAAATTCATACCTG     |
| TNF- $\alpha$ | F | CAGGCGGTGCCTATGTCTC      |
|               | R | CGATCACCCCGAAGTTCAGTAG   |
| IL-1 $\beta$  | F | ACCTTCCAGGATGAGGACATGA   |
|               | R | CTAATGGGAACGTCACACACCA   |
| IL-6          | F | ACCAGAGGAAATTTCAATAGGC   |
|               | R | TGATGCACTTGCAGAAAACA     |
| p16           | F | CTCAGCCCGCCTTTTCTTC      |
|               | R | CGCCTTCGCTCAGTTTCTCATG   |
| p53           | F | AACTTACCAAGGCAACTATG     |
|               | R | CTTGATAGATGGCCATGGCAC    |

## 1.3 Microbial gene sequencing

Total bacterial DNA in feces was extracted from the samples following the kit's protocol (Fast DNA Stool Kit, MP Biomedicals, CA, USA), and the extracted DNA was amplified in the V3-V4 region of 16S rRNA (universal primers, 341F/806R). The amplification comprised an

initial denaturation stage at 95 °C for 5 minutes, followed by 30 cycles of 95 °C for 30 seconds, 52 °C for 30 seconds, and 72 °C for 30 seconds, and a final extension step at 72 °C. After cycling, a final extension at 72 °C for 5 minutes was performed, and the reaction was then kept at 4 °C. The obtained DNA was recovered and purified (TIANGel Mini Purification Kit, TIANGEN, Beijing, China). DNA was quantified and pooled in equal concentrations following the instructions of the Qubit dsDNA Assay Kit (Life Technologies, CA, USA). Libraries were generated using the TruSeq DNA LT Sample Preparation Kit (Illumina, CA, USA), and samples were bar-coded and finally paired-end sequenced on the Illumina MiSeq PE300 platform following the manufacturer's protocol.

#### **1.4 Histological and immunohistochemistry examination**

Brain tissues were fixed with 10% neutral formaldehyde solution and then paraffin embedded. The tissues were sectioned and mounted on clean glass slides, then baked at 60 °C for 2 h and treated with dimethyl benzene for 20 min each time. Each section was treated with ethanol, 95% ethanol, 80% ethanol and distilled water in sequence until it became transparent. Sections underwent hematoxylin eosin (HE) staining.

For immunohistochemistry, endogenous peroxidase activity in sectioned tissue was blocked with 3% H<sub>2</sub>O<sub>2</sub> and non-specific binding sites were blocked with 3% normal goat serum. Sections were incubated with anti-Iba1 for 1 h at 37 °C. Subsequently, the sections were washed in PBS and incubated with biotinylated goat anti-rabbit IgG secondary antibody for 1 h at room temperature, followed by incubation for 1 h with an avidin–biotin–horseradish peroxidase complex. Histological features of these sections were examined under a microscope (Nikon).

## 2. Results

**Table S3. Results of statistical analysis of indicators**

| Indexes                              | Normal distribution test (Shapiro-Wilk test) |             |                | Homogeneity test of variance (Brown-Forsythe test) |                                             | ANOVA   |                                           | Kruskal-Wallis test |                | Corresponding graph |
|--------------------------------------|----------------------------------------------|-------------|----------------|----------------------------------------------------|---------------------------------------------|---------|-------------------------------------------|---------------------|----------------|---------------------|
|                                      | Control Group                                | Model Group | CCFM8661 Group | P value                                            | Are SDs significantly different (P < 0.05)? | P value | Significant diff. among means (P < 0.05)? | P value             | Neous variance |                     |
| Cognitive index                      | Yes                                          | Yes         | Yes            | 0.9045                                             | No                                          | 0.0075  | Yes                                       | -                   | -              | Figure 1 b          |
| Discriminant index                   | Yes                                          | Yes         | Yes            | 0.9045                                             | No                                          | 0.0075  | Yes                                       | -                   | -              | Figure 1 c          |
| Alternation number                   | Yes                                          | Yes         | Yes            | 0.0671                                             | No                                          | <0.0001 | Yes                                       | -                   | -              | Figure 1 d          |
| The number of maximum alternations   | Yes                                          | Yes         | Yes            | 0.2016                                             | No                                          | 0.0024  | Yes                                       | -                   | -              | Figure 1 e          |
| Spontaneous alternate behavior score | Yes                                          | Yes         | Yes            | 0.7401                                             | No                                          | 0.0002  | Yes                                       | -                   | -              | Figure 1 f          |
| The total distance of movement       | No                                           | Yes         | Yes            | -                                                  | -                                           | -       | -                                         | 0.8566              | No             | Figure 1 g          |
| Movement speed                       | Yes                                          | Yes         | Yes            | 0.2298                                             | No                                          | 0.6236  | No                                        | -                   | -              | Figure 1 h          |
| Time proportion                      | Yes                                          | Yes         | Yes            | 0.3503                                             | No                                          | 0.0079  | Yes                                       | -                   | -              | Figure 1 i          |
| Frequency of exploration             | Yes                                          | Yes         | Yes            | 0.9189                                             | No                                          | 0.2784  | No                                        | -                   | -              | Figure 1 j          |
| Exploratory behavior score           | Yes                                          | Yes         | Yes            | 0.2602                                             | No                                          | 0.014   | Yes                                       | -                   | -              | Figure 1 k          |
| p16(qPCR)                            | Yes                                          | Yes         | Yes            | 0.1816                                             | No                                          | <0.0001 | Yes                                       | -                   | -              | Figure 2 a          |
| P53(qPCR)                            | Yes                                          | Yes         | Yes            | 0.4370                                             | No                                          | <0.0001 | Yes                                       | -                   | -              | Figure 2 a          |
| p16(ELISA)                           | Yes                                          | Yes         | Yes            | 0.1717                                             | No                                          | 0.0251  | Yes                                       | -                   | -              | Figure 2 a          |
| P21(ELISA)                           | Yes                                          | Yes         | Yes            | 0.7225                                             | No                                          | 0.0373  | Yes                                       | -                   | -              | Figure 2 a          |
| P53(ELISA)                           | Yes                                          | Yes         | Yes            | 0.0521                                             | No                                          | 0.1235  | No                                        | -                   | -              | Figure 2 a          |
| Brain-Gsr                            | Yes                                          | Yes         | Yes            | 0.5739                                             | No                                          | 0.0037  | Yes                                       | -                   | -              | Figure 2 b          |

|                                     |     |     |     |         |     |         |     |        |     |             |
|-------------------------------------|-----|-----|-----|---------|-----|---------|-----|--------|-----|-------------|
| Brain-HO-1                          | Yes | Yes | Yes | 0.087   | No  | 0.0017  | Yes | -      | -   | Figure 2 b  |
| Brain-Klotho                        | No  | Yes | Yes | -       | -   | -       | -   | 0.0018 | Yes | Figure 2 b  |
| Brain-Akt1                          | Yes | Yes | Yes | 0.5351  | No  | 0.0063  | Yes | -      | -   | Figure 2 b  |
| Brain-p65                           | Yes | Yes | Yes | 0.719   | No  | 0.0813  | No  | -      | -   | Figure 2 b  |
| TNF- $\alpha$                       | Yes | Yes | Yes | 0.13912 | No  | 0.0002  | Yes | -      | -   | Figure 2 c  |
| IL-1 $\beta$                        | Yes | Yes | Yes | 0.1049  | No  | 0.0002  | Yes | -      | -   | Figure 2 c  |
| IL-6                                | Yes | Yes | Yes | 0.3989  | No  | 0.0006  | Yes | -      | -   | Figure 2 c  |
| Brain-MDA                           | Yes | Yes | Yes | 0.5790  | No  | <0.0001 | Yes | -      | -   | Figure 2 d  |
| Brain-GSH                           | Yes | No  | Yes | -       | -   | -       | -   | 0.0005 | Yes | Figure 2 d  |
| Brain-SOD                           | Yes | Yes | Yes | 0.0227  | Yes | -       | -   | 0.0325 | Yes | Figure 2 d  |
| Occludin                            | Yes | Yes | Yes | 0.8615  | No  | <0.0001 | Yes | -      | -   | Figure S5 b |
| Claudin-1                           | Yes | No  | Yes | -       | -   | -       | -   | 0.0017 | Yes | Figure S5 b |
| ZO-1                                | Yes | Yes | Yes | 0.3694  | No  | <0.0001 | Yes | -      | -   | Figure S5 b |
| ZO-2                                | Yes | Yes | Yes | 0.8115  | No  | 0.0003  | Yes | -      | -   | Figure S5 b |
| Liver-T-AOC                         | Yes | Yes | Yes | 0.6425  | No  | 0.0011  | Yes | -      | -   | Figure S5 c |
| Liver-GSH                           | Yes | Yes | Yes | 0.2263  | No  | 0.0006  | Yes | -      | -   | Figure S5 c |
| Bone-BALP                           | Yes | Yes | Yes | 0.8975  | No  | <0.0001 | Yes | -      | -   | Figure S5 d |
| Bone-TRACP-5b                       | Yes | Yes | Yes | 0.4166  | No  | <0.0001 | Yes | -      | -   | Figure S5 d |
| Bone- $\beta$ -CTx                  | Yes | Yes | Yes | 0.4018  | No  | 0.0012  | Yes | -      | -   | Figure S5 d |
| Shannon index                       | Yes | Yes | Yes | 0.2590  | No  | 0.4363  | No  | -      | -   | Figure 4 a  |
| Chao1 index                         | Yes | Yes | Yes | 0.5128  | No  | 0.9647  | No  | -      | -   | Figure 4 a  |
| Pielou index                        | Yes | Yes | Yes | 0.2938  | No  | 0.3759  | Yes | -      | -   | Figure 4 a  |
| Relative abundance of Bacteroidetes | Yes | Yes | Yes | 0.0126  | Yes | -       | -   | 0.0487 | Yes | Figure 4 d  |
| Relative abundance of Firmicutes    | Yes | Yes | No  | -       | -   | -       | -   | 0.1234 | No  | Figure 4 d  |
| Firmicutes/Bacteroidetes ratio      | Yes | Yes | Yes | 0.5939  | No  | <0.0001 | Yes | -      | -   | Figure 4 d  |
| Acetic acid                         | Yes | Yes | Yes | 0.7162  | No  | 0.0003  | Yes | -      | -   | Figure 5 b  |

|                 |     |     |     |        |    |        |     |   |   |            |
|-----------------|-----|-----|-----|--------|----|--------|-----|---|---|------------|
| Propanoic acid  | Yes | Yes | Yes | 0.2928 | No | 0.0082 | Yes | - | - | Figure 5 b |
| Isobutyric acid | Yes | Yes | Yes | 0.5766 | No | 0.0108 | Yes | - | - | Figure 5 b |
| Butyric acid    | Yes | Yes | Yes | 0.4162 | No | 0.006  | Yes | - | - | Figure 5 b |
| Pentanoic acid  | Yes | Yes | Yes | 0.0852 | No | 0.0053 | Yes | - | - | Figure 5 b |

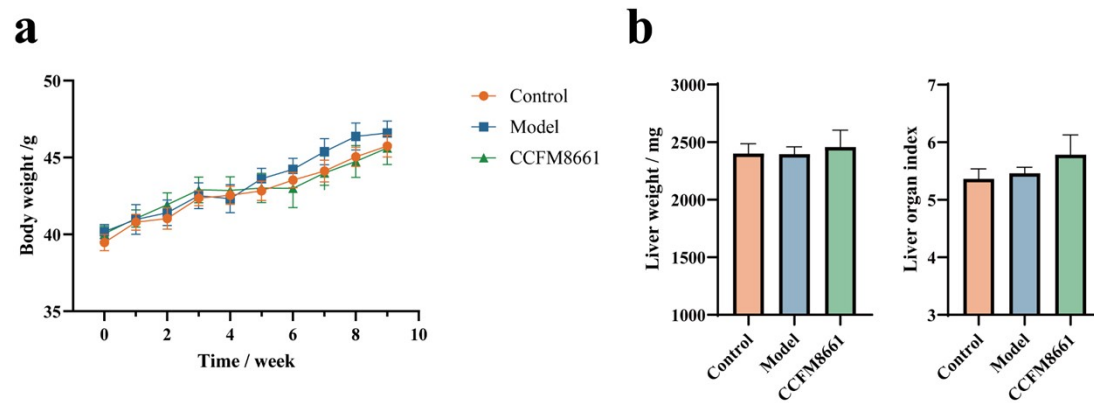

**Figure S2.** Effects of *L. plantarum* CCFM8661 administration on body weight and liver weight in mice: (a) Changes of body weight in mice during the intervention period. (b) Liver weight and liver organ index in mice. Data are represented as mean  $\pm$  SEM..

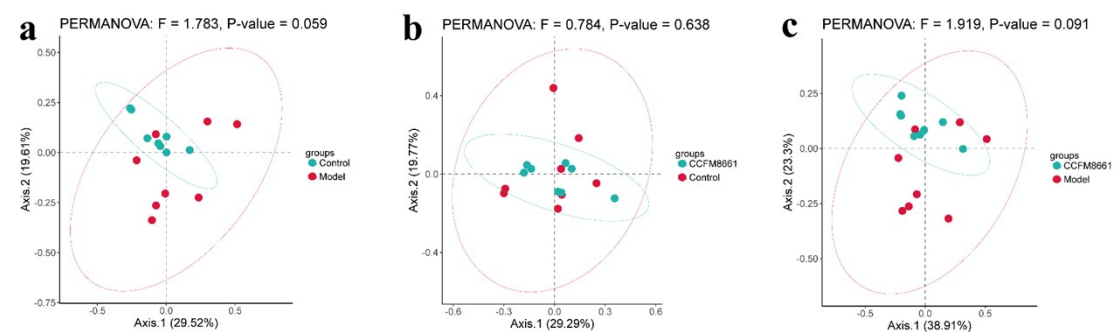

**Figure S3.** Comparison of  $\beta$ -diversity among groups. (a) Control and Model groups. (b) Control and CCFM8661 groups. (c) CCFM8661 and Model groups.  $\beta$ -diversity was calculated using Bray-Curtis distance, shown by principal coordinate analysis (PCoA), and differences were determined using permutation multivariate Analysis of variance (perMANOVA). Diversity maps were analyzed on the free online site ([https://bioincloud.tech/standalone-task-ui/bray\\_pcoa](https://bioincloud.tech/standalone-task-ui/bray_pcoa)).

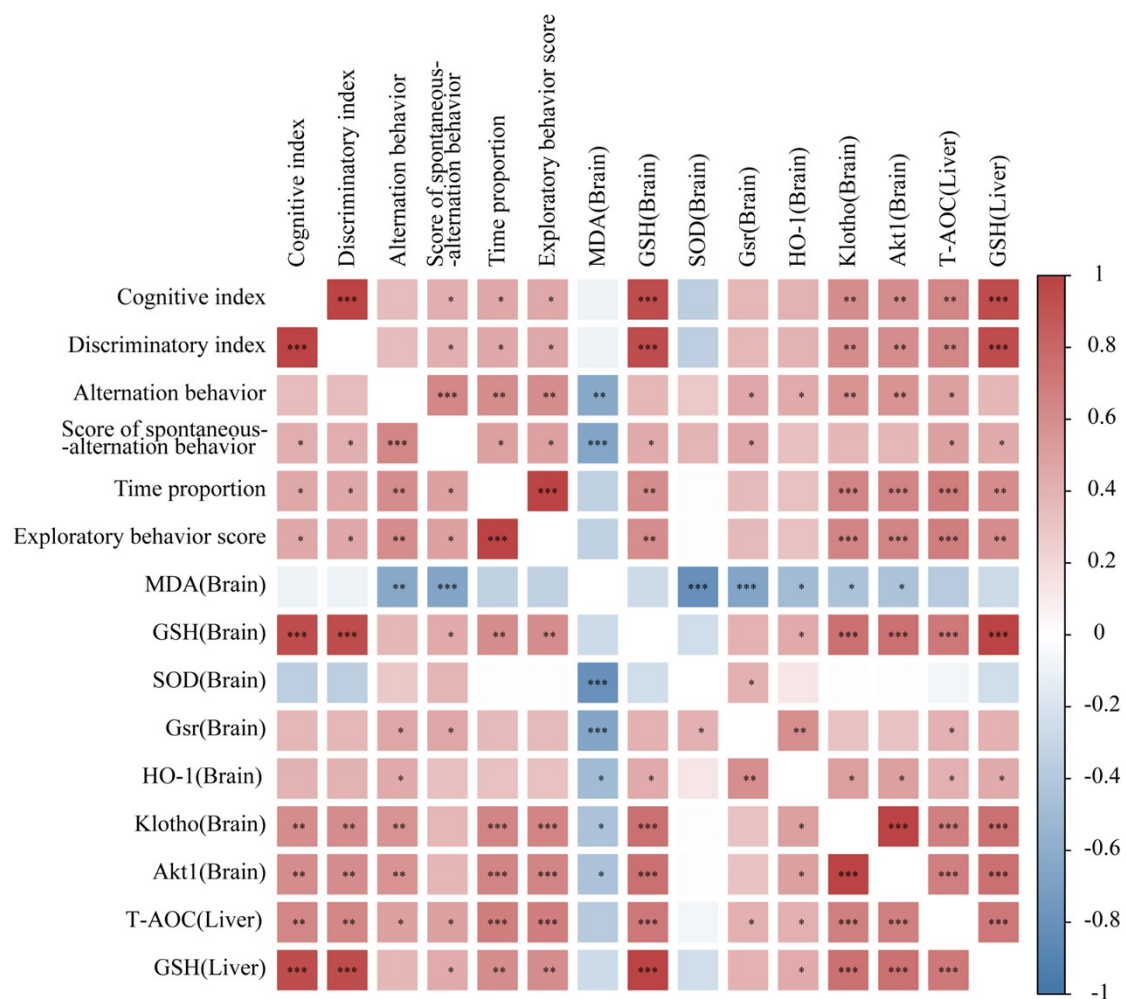

**Figure S4.** Correlation analysis between behavioral indicators and oxidative stress indicators. (Spearman's correlation analysis, an online website was used to create drawing: <https://www.omicstudio.cn>)

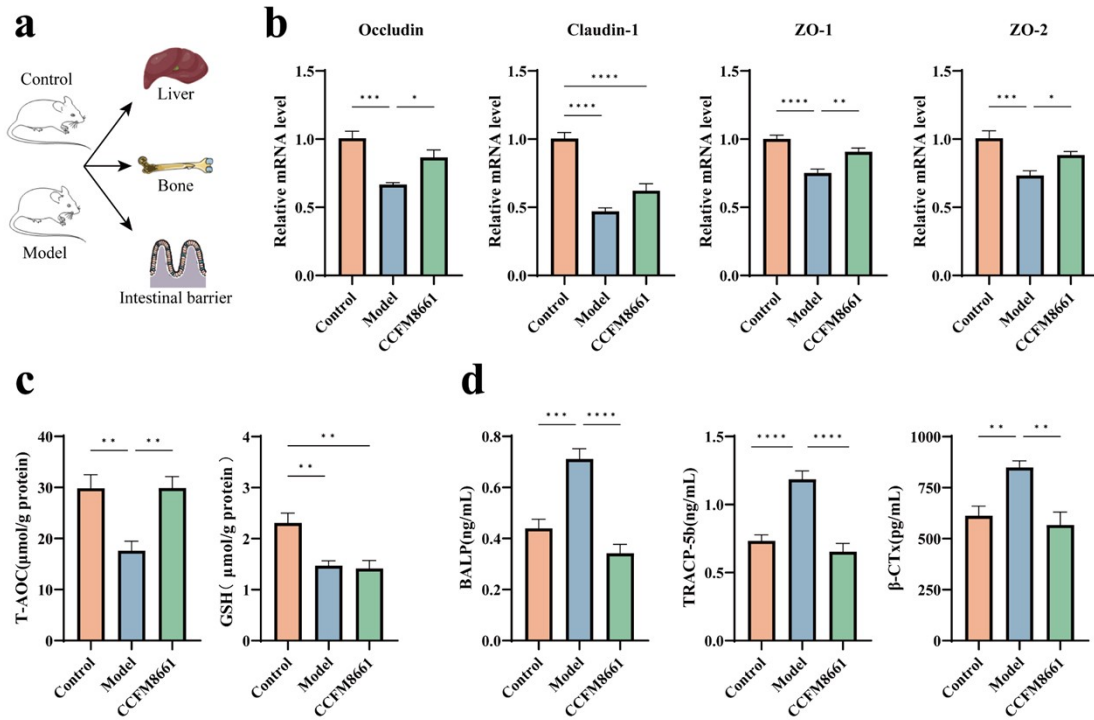

**Figure S5.** Effects of *L. plantarum* CCFM8661 administration on some tissues in mice: (a) Diagram of the indicators. (b) The relative expression of four TJP genes in the colon. (c) Oxidative stress in the liver, including T-AOC and GSH levels. (d) Biochemical indicators of bone metabolism. Data are presented as means  $\pm$  SEM.
