# Supplementary figures and images for: Lactiplantibacillus plantarum CCFM8661 alleviates d-galactose-induced brain aging in mice by the regulation of the gut microbiota
Source: Royal Society of Chemistry journal article supplement (doi:10.1039/d3fo03377e), 2023-01-01

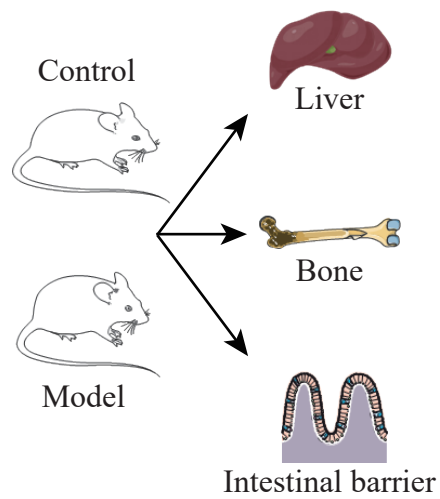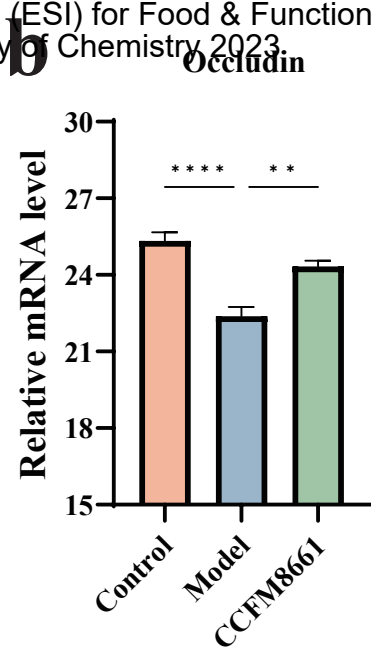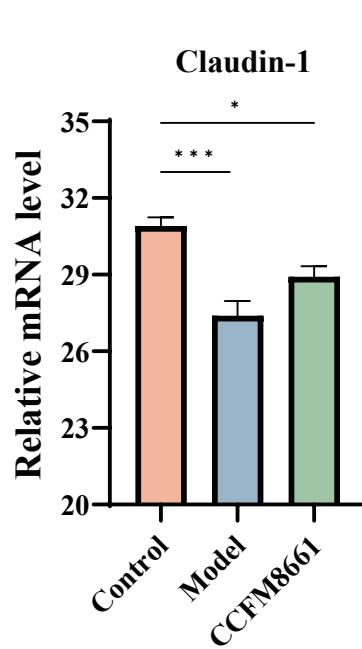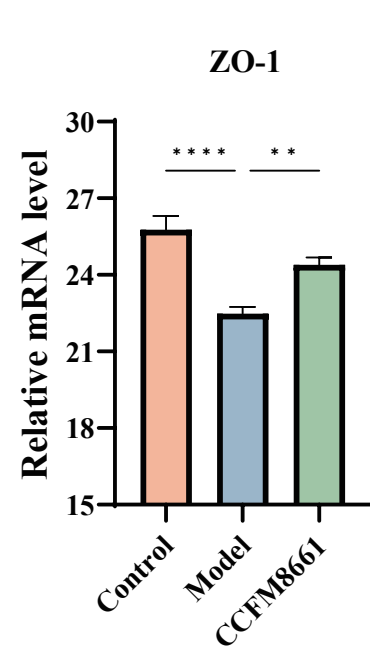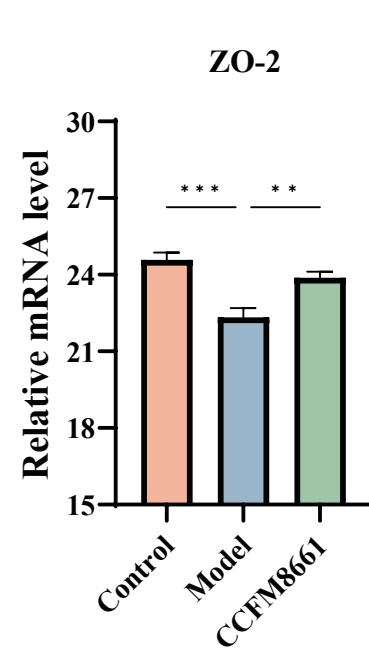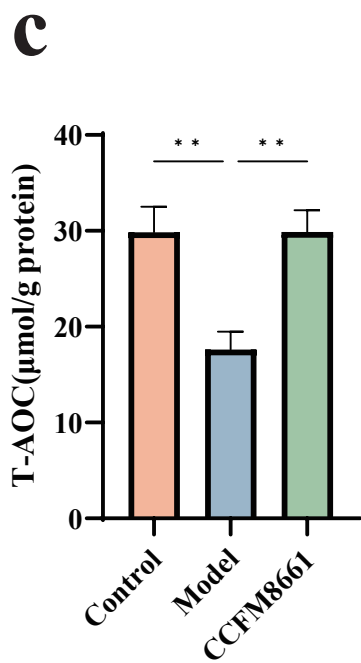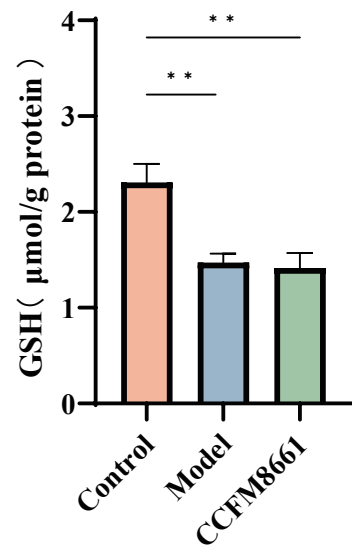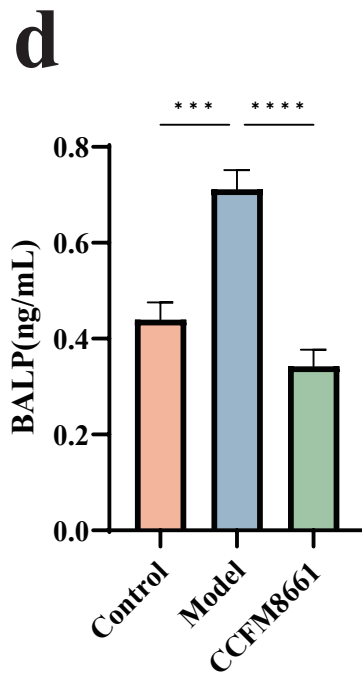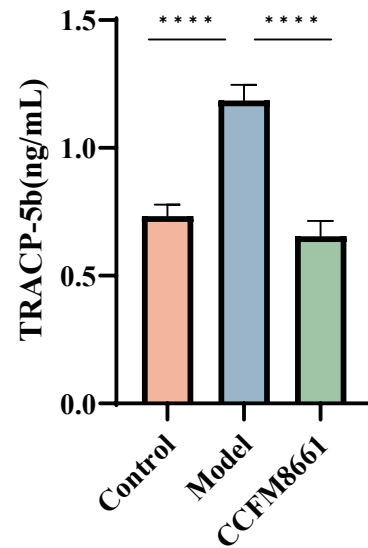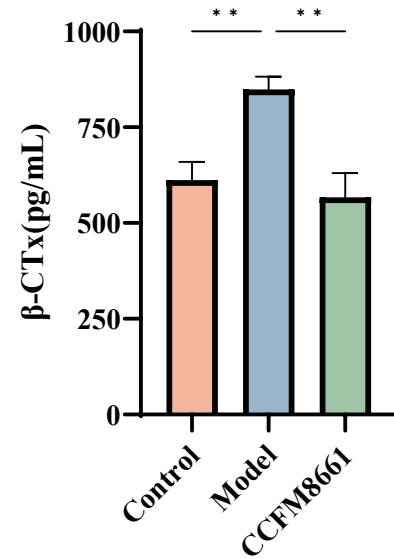

Supplement: d3fo03377e2.pdf [file d3fo03377e2.pdf]
